# Supplementary material for: Structure and Physical Properties of Mg93−xZnxCa7 Metallic Glasses
Source: MDPI journal article supplement (doi:10.3390/ma16062313), 2023-03-14
Supplement: s1 [file s1]

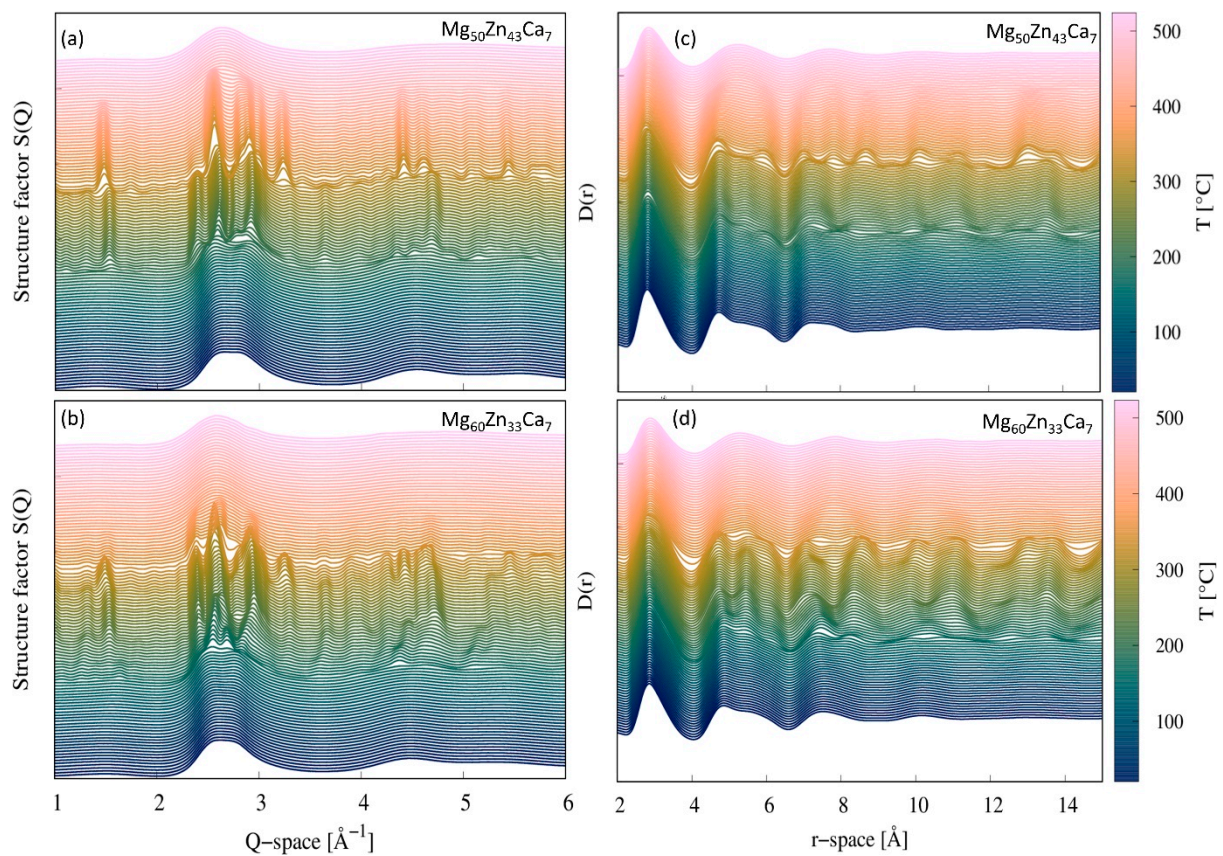

Figure S1. :  $S^x(Q)$  and  $D^x(r)$  temperature evolution during in situ HEXRD measurements for  $\text{Mg}_{50}\text{Zn}_{43}\text{Ca}_7$  (a) and (b) and  $\text{Mg}_{50}\text{Zn}_{43}\text{Ca}_7$  (c) and (d).
